1  
2  
3  
4  
5  
6  
7  
8  
9  
10  
11  
12  
13  
14  
15  
16  
17  
18  
19  
20  
21  
22  
23  
24

# Epigenetic Profiling Provides Insights into AIDS Resistance in African Green Monkey

Zheng Yuan, Xiao-jun Zhou

Laboratory Animal Center of the Academy of Military Medical Sciences, Beijing, China

Correspondence to: Dr.Xiaojun Zhou . Laboratory Animal Center of the Academy of Military Medical Sciences, Beijing 100071, China. zhouxiaojun320320@126.com.

Telephone:+86-10-66948217.

**Funding:** This study was funded by the National Projects of Infectious Disease under Grant No.2017ZX10304402003 and the National Natural Science Foundation of China under Grant No.31501908.

**Competing Interests:** The authors have declared that no competing interests exist.

## Abstract

As a natural host of simian immunodeficiency virus (SIV), African green monkeys (AGM) do not develop AIDS although high levels of SIV replication were maintained. Low frequencies of CD4<sup>+</sup> T cells and high frequencies of CD8<sup>dim</sup> T cells were observed in healthy adult AGM, which may partially explain the absence of SIV-induced disease progression. Elucidating the mechanisms that allow this natural host co-exist with SIV without progressive disease may facilitate knowledge of AIDS pathogenesis. Here we show: (1) Compared with junior AGM, 3 miRNA were up-regulated in adult AGM in which hsa-miR-151a-3p was

1 shown to target both *CD4* and *MAZR*; 15 miRNAs were down-regulated in adult AGM in  
2 which hsa-miR-140-5p, hsa-miR-126-3p and hsa-miR-194-5p were shown to target *CD8 $\alpha$* ; (2)  
3 MeDIP sequencing analysis of adult AGM samples revealed that hypermethylation exists in  
4 the promoter region of *CD4*, *CXCR6*, *CCR5*, while hypomethylation exists in the promoter  
5 region of *RUNX3*, *ICAM2*; (3) Hypomethylation in the promoter region of *PTK2* contributes  
6 to up-regulated expression of hsa-miR-151a-3p in adult AGM, while hypermethylation in the  
7 promoter region of *WWP2* contributes to down-regulated expression of hsa-miR-140-5p. Our  
8 data for the first time demonstrates the link between miRNA and DNA methylation  
9 expression profile, which may together contribute to the phenotype of AIDS resistance in  
10 AGM.

11

## 12 **Author Summary**

13 African green monkeys (AGM) do not develop AIDS although high levels of SIV replication  
14 were maintained. Elucidating the mechanisms that allow this natural host co-exist with SIV  
15 without progressive disease may facilitate knowledge of AIDS pathogenesis. In this study,  
16 the miRNA expression patterns were found to be associated with the switch from  $CD4^+$  to  
17  $CD4^+CD8a^{dim}$  in adult AGM. The up-regulated hsa-miR-151a-3p was shown to target both  
18 AGM *CD4* and *MAZR*, while the down-regulated hsa-miR-140-5p, hsa-miR-126-3p and  
19 hsa-miR-194-5p were shown to target AGM *CD8 $\alpha$* . And none of these miRNAs possess  
20 target sites in cynomolgus macaque (CM) *CD4*, *CD8 $\alpha$*  and *MAZR* reflecting differences in  
21 AIDS resistance between these two species. Our data also demonstrates the link between  
22 miRNA and DNA methylation expression profile, indicating that multiple distinct

1 mechanisms may contribute to AIDS resistance in AGM. Knowledge of the non-pathogenic  
2 nature of SIV infection in AGM may provide insight into development of new therapeutic  
3 strategies.

## 5 **Introduction**

6 Simian immunodeficiency viruses (SIV) belong to the group of lentiviruses that infect  
7 non-human primates (NHP). Like HIV-1 and HIV-2, all known SIV subtypes use CD4 as a  
8 receptor and either CCR5, CXCR4, CCR2 as a co-receptor [1,2,3]. SIV infection of natural  
9 hosts, such as AGM, is usually lack of progression to AIDS despite high viraemia, while HIV  
10 infection in humans and experimental SIV infection in rhesus macaques (*Macaca mulatta*)  
11 progress to AIDS. One obvious difference between progressive HIV infection and  
12 non-progressive SIV infection is the absence of immune activation during the chronic phase  
13 of infection in natural hosts [4].

14 Low frequencies of CD4<sup>+</sup> T cells and high frequencies of CD8<sup>dim</sup> T cells have been shown to  
15 exist in healthy adult AGM [5,6]. CD8<sup>dim</sup> T cells could induce antibody production from B  
16 cells in vitro suggesting that CD8<sup>dim</sup> T cells might supplement for the lack of CD4<sup>+</sup> T cells in  
17 AGM [7]. Down-regulation of CD4 by memory T cells in adult AGM protects these T cells  
18 from infection by SIV<sub>agm</sub> in vivo [8], but the molecular mechanism remains unclear.  
19 Epigenetic phenomena are defined as heritable mechanisms that establish and maintain  
20 mitotically stable patterns of gene expression without modifying the base sequence of DNA,  
21 which include DNA methylation, post-translational histone modifications and RNA-based  
22 mechanisms including those controlled by small non-coding RNAs (miRNAs) in mammalian

1 cells [9].

2 This study aims to identify the differential expressed miRNAs, as well as DNA methylation  
3 features, between junior and adult AGM, which may provide insights into AIDS resistance in  
4 AGM and add knowledge to development of new therapeutic strategies.

5

## 6 **Materials and Methods**

### 7 **Ethics Statement**

8 SIVagm-uninfected junior (less than 2 years old) and adult (more than 5 years old) AGM  
9 were chosen for analysis. Animals were housed in troop enclosures with an outdoor facility  
10 and fed nonhuman primate chow per day and a combination of fresh bananas, apples, carrots  
11 3 days per week. Toys were available for animals raised for the purpose of environment  
12 enrichment. The experiments were conducted in accordance with the recommendations of the  
13 ethics provision for experiments on non-human primate of the ethics committee of the  
14 Academy of Military Medical Sciences. The protocol was approved by the ethics committee  
15 of the Academy of Military Medical Sciences with the identification number 2018032. All  
16 protocols were in strict accordance with the recommendations in the Guide for the Care and  
17 Use of Laboratory Animals.

### 18 **PBMC Isolation**

19 Peripheral blood mononuclear cells were isolated from fresh blood by Ficoll gradient  
20 separation.  $1 \times 10^7$  cells were mixed with 600  $\mu$ l mirVana RNA lysis buffer (Ambion, Austin,  
21 Texas, USA) to achieve lysis and inactivate endogenous RNAses. Lysates were frozen at -80  
22 °C until further processing.

## 1 **RNA isolation and Small RNA Deep Sequencing**

2 Total RNA was isolated using the RNeasy mini kit (Qiagen) according to the manufacturers'  
3 instructions. Small RNA libraries were created using the TruSeq Small RNA Sample  
4 Preparation Kit (Illumina) and sequencing performed using HiSeq 2000 sequencer (Illumina).  
5 The small RNA deep sequencing and data analysis were carried out by Shanghai KangChen  
6 biotechnology company (Shanghai, China).

## 7 **Inhibition of endogenous miRNAs**

8 Locked nucleic acid (LNA)-modified anti-miRs (Exiqon) were used for the inhibition of  
9 endogenous miRNAs in PBMCs of junior and adult AGM [10]. PBMC were maintained in  
10 RPMI1640 supplemented with 100 U/ml penicillin, 100 µg/ml streptomycin and 10% fetal  
11 bovine serum (FBS) (Invitrogen). LNA-modified anti-miRs were transfected at a final  
12 concentration of 10 nM by Entranster<sup>TM</sup>-R4000 (Engreen Biosystem).

## 13 **Real-Time Quantitative Reverse-Transcription Polymerase Chain Reaction**

14 MMLV reverse transcriptase (Takara) was used for the reverse-transcription (RT) reaction  
15 and quantitative PCR was performed by an ABI PRISM7500 system (Applied Biosystems).  
16 The RT primers and the primer sets specific for each miRNA amplification are shown in  
17 Supplementary Table 1. Expression of selected miRNAs and mRNA of the target genes  
18 predicted to be targeted by miRNAs inhibited by anti-miR transfection were measured by  
19 qPCR using SYBR green chemistry [11]. Primer sequences for the target genes are listed in  
20 Supplementary Table 2.

## 21 **DNA isolation and MeDIP sequencing**

22 DNA was isolated using the QIAamp DNA mini kit (Qiagen) according to the manufacturers'

1 instructions. Isolated DNA were fragmented to a size range of ~200-500bp with a Diagenode  
2 Bioruptor. About 1  $\mu$ g of fragmented DNA was prepared for Illumina HiSeq 4000 sequencing  
3 as the following steps: 1) End repair of DNA samples; 2) A single 'A' base was added to the  
4 3' ends; 3) Illumina's genomic adapters were ligated to DNA fragments; 4) DNA fragments  
5 were immunoprecipitated by anti-5-methylcytosine antibody; 5) Immunoprecipitated DNA  
6 fragments were amplified by PCR amplification; 6) Size selection of ~300-600bp DNA  
7 fragments using AMPure XP beads. The completed libraries were quantified by Agilent 2100  
8 Bioanalyzer. The libraries were denatured with 0.1 M NaOH to generate single-stranded  
9 DNA molecules, captured on Illumina flow cell, amplified in situ. The libraries were then  
10 sequenced on the Illumina HiSeq 4000 following the HiSeq 3000/4000 SBS Kit (300 cycles)  
11 protocol. After sequencing images generated, the stages of image analysis and base calling  
12 were performed using Off-Line Basecaller software (OLB V1.8). After passing Solexa  
13 CHASTITY quality filter, the clean reads were aligned to *Chlorocebus-sabaeus* genome  
14 (ensemble ChlSab1) using HISAT2 software (V2.1.0). Aligned reads were used for peak  
15 calling of the MeDIP regions using MACS V2, statistically significant MeDIP enriched  
16 regions (peaks) were identified for each sample at a q-value threshold of  $10^{-5}$  using MACS  
17 v2. Statistically significant differentially methylated regions (DMRs) between two groups  
18 promoters were identified by diffReps (Cut-off: FC=1.0, p-value=0.05).

### 19 **Quantitative SYBR green methylation-specific PCR (QSG-MSP)**

20 QSG-MSP was performed to quantify the levels of CpG DNA methylation of *CD4* and  
21 *RUNX3*. Primers for QSG-MSP were designed using Methyl Primer Express Software v1.0  
22 (Applied Biosystems). Primer sequences for *CD4*, *RUNX3* and *ACTB* were listed in

1 Supplementary table 3. Quantitative PCR was performed in a 25  $\mu$ l reaction volume with  
2 12.5  $\mu$ l of 2 $\times$ SYBR Green PCR Master Mix (Applied Biosystems), 2.5 pmol of each primer,  
3 and 50 ng of bisulfite-treated DNA sample. Thermal cycling was as follows: 95°C for 10 min,  
4 40 cycles of 95°C for 15 s, 60°C for 1 min. The amount of methylated DNA (percentage  
5 of methylated reference) was calculated as follows: ratio of quantity of target gene to quantity  
6 of target gene of test sample divided quantity of *ACTB*.

### 7 **Statistical Analysis**

8 Values were expressed as mean  $\pm$  SD. The comparative CT method was used in real-time  
9 qRT-PCR assay according to the delta-delta CT method. Statistical analyses were performed  
10 using GraphPad Prism version 5.01. t test was used to compared statistical differences. The  
11 data were considered statistically significant at  $P < 0.05$ .

12

## 13 **Results**

### 14 **Differential miRNA expression in PBMCs from junior and adult AGM**

15 Different from junior AGM, low frequencies of CD4<sup>+</sup> T cells and high frequencies of CD8<sup>dim</sup>  
16 T cells were observed in healthy adult AGM, which may partially explain the absence of  
17 SIV-induced disease progression. To investigate the role of miRNA in this process, we  
18 profiled the PBMC miRNA expression in 3 junior AGM and 3 adult AGM. As shown in  
19 Figure 1a, 3 miRNAs were up-regulated while 15 miRNAs were down-regulated with over  
20 1.5-fold change in adult AGM ( $P < 0.05$ ). To validate the profiling data, miRNAs in Table 1  
21 were further analyzed via quantitative RT-PCR between PBMCs from 5 junior AGM and 5  
22 adult AGM. Results showed a 3.6-fold decrease for hsa-miR-215-5p ( $P < 0.01$ ), a 2.0~2.5-fold

1 decrease for hsa-miR-194-5p, hsa-miR-99b-5p, hsa-miR-125a-5p (all  $P < 0.01$ ), a 2.0~2.5-fold  
2 increase for hsa-miR-95-3p ( $P < 0.01$ ), a 1.5~2.0-fold decrease for hsa-miR-126-3p,  
3 hsa-miR-181b-5p, hsa-miR-140-5p, hsa-miR-199a-3p, hsa-miR-10a-5p (all  $P < 0.01$ ), and a  
4 1.5~2.0-fold increase for hsa-miR-151a-3p, hsa-miR-10b-5p (all  $P < 0.05$ ) (Figure 1b and 1c).

### 5 **Effects of selected miRNAs on AGM *CD4*, *CD8 $\alpha$* and *MAZR***

6 As MAZR is a protein suppressor of the *CD8 $\alpha$*  enhancer region [12], we investigate whether  
7 the above miRNAs target AGM *CD4*, *CD8 $\alpha$*  and *MAZR*. hsa-miR-151a-3p was predicted to  
8 target AGM *CD4* and *MAZR* while hsa-miR-140-5p, hsa-miR-126-3p and hsa-miR-194-5p  
9 were predicted to target AGM *CD8 $\alpha$*  (Figure 2a). Then, the potential miRNA-target pairs  
10 were examined by inhibiting these endogenous miRNAs in PBMCs using LNA-modified  
11 anti-miRs. Anti-miR treatment may cause the increase on the abundance of the target mRNA  
12 if it is indeed suppressed by the endogenous miRNA via mRNA degradation. As shown in  
13 Figure 2b, the selected miRNAs were all validated to target AGM *CD4*, *CD8 $\alpha$*  and *MAZR*,  
14 respectively. Interestingly, none of these miRNAs possess target sites in cynomolgus  
15 macaque (CM) *CD4*, *CD8 $\alpha$*  and *MAZR*, which may partially explain the differences in AIDS  
16 resistance between these two species.

### 17 **Differential DNA methylation in PBMCs from junior and adult AGM**

18 Besides miRNA profiles, we wondered whether differences also exist in DNA methylation  
19 profiles and performed MeDIP sequencing. Genes with significantly different DNA  
20 methylation signals in promoter regions were selected and the Top10 biological processes  
21 (BP) were listed through Gene Ontology (GO) analysis (Figure 3). RUNX3 is required for the  
22 establishment of epigenetic silencing of *CD4* in cytotoxic-lineage thymocytes [13]. Our



1 results showed hypomethylation in *RUNX3* promoter and up-regulation of its mRNA in adult  
2 AGM (Figure 4b and 4f), as well as hypermethylation in CD4 promoter (Figure 4a), which  
3 together may account for the CD4 repression in adult AGM T cells. Although CD8 $\alpha$  was  
4 over-expressed in adult AGM T cells, we did not find similar DNA methylation changes in  
5 proteins regulating CD8 expression, such as MAZR, TOX, Ikaros [14], suggesting other  
6 mechanisms may exist. As a coreceptor used by SIV *in vivo*, the level of CCR5 is very low  
7 on CD4<sup>+</sup> T cells of natural host species [15,16]. CXCR6 is another potential alternative  
8 coreceptor for SIV as an efficient entry pathway *in vitro* [17,18]. Analysis through QSG-MSP  
9 demonstrated both hypermethylation in CXCR6 and CCR5 promoters (Figure 4c and 4d) and  
10 both mRNAs were down-regulated in adult AGM PBMCs (Figure 4f), providing another  
11 insight into AIDS resistance in African green monkey. Recently, the genome of another  
12 natural host, sooty mangabeys (*Cercocebus atys*), has been sequenced and assembled [19].  
13 Also, the *C.atys* immune-regulatory protein intercellular adhesion molecule 2 (ICAM-2) was  
14 found to possess a major structural change in exons 3-4 and expression of this variant leads to  
15 reduced cell surface expression of ICAM-2. Our results showed that hypomethylation in  
16 promoter region of ICAM-2 existed in adult AGM (Figure 4e) and expression of ICAM-2  
17 was significantly up-regulated in adult AGM (Figure 4f). Furthermore, hypomethylation in  
18 the promoter region of *PTK2*, as well as hypermethylation in the promoter region of *WWP2*  
19 was demonstrated in adult AGM (Figure 5a and 5b), in which hsa-miR-151a-3p and  
20 hsa-miR-140-5p was located, respectively. This indicates a cross-link between roles of DNA  
21 methylation and miRNA expression in AIDS resistance in AGM.

22

## 1 **Discussion**

2 Natural hosts have co-evolved with SIV and are capable of avoiding disease progression, of  
3 which mechanisms may diverge. Unlike AGM, sooty mangabey (SM) maintains healthy  
4 frequencied of CD4<sup>+</sup> T cells and genome sequencing has identified two gene products  
5 (ICAM-2 and TLR-4), which show structural differences that may influence cell-surface  
6 expression (ICAM-2) and downstream signalling (TLR-4) [19]. In AGM, the co-evolution  
7 with SIV<sub>agm</sub> may be accounted for partially by the development of CD4<sup>+</sup>CD8<sup>dim</sup> T cells  
8 from memory CD4<sup>+</sup> T cells. Like other natural hosts of SIV, CD4-like immunological  
9 functions can be elicited by CD4<sup>+</sup> T cells in AGM [20] and preservation of CD4<sup>+</sup> T cell  
10 function may contribute to the lack of immune activation in AGM and SM [5,21,22].

11 It has been shown that memory CD4<sup>+</sup> T cells down-regulate CD4 and up-regulate CD8 $\alpha$  [8],  
12 but the actual mechanism(s) underlying the switch from CD4<sup>+</sup> to CD4<sup>+</sup>CD8<sup>dim</sup> remains  
13 unclear. Previous studies have demonstrated genetic differences between certain regulatory  
14 elements from AGM compared to other primates [23]. miRNAs result in translational  
15 suppression of suppression of target mRNA in all known animal and plant genomes [24].  
16 DNA methylation is an epigenetic modification typically associated with stable  
17 transcriptional silencing and plays an important role in several biological processes  
18 associated with development and disease [25,26]. In this study, the miRNA expression  
19 patterns were found to be associated with the switch from CD4<sup>+</sup> to CD4<sup>+</sup>CD8<sup>dim</sup> in adult  
20 AGM. The up-regulated hsa-miR-151a-3p was shown to target both AGM *CD4* and *MAZR*,  
21 while the down-regulated hsa-miR-140-5p, hsa-miR-126-3p and hsa-miR-194-5p were  
22 shown to target AGM *CD8 $\alpha$* . And none of these miRNAs possess target sites in cynomolgus

1 macaque (CM) *CD4*, *CD8 $\alpha$*  and *MAZR* reflecting differences in AIDS resistance between  
2 these two species. Differential DNA methylation in promoter regions of *CD4*, *RUNX3*,  
3 *CXCR6*, *CCR5*, *ICAM-2*, as well as *PTK2* and *WWP2*, was also demonstrated indicating that  
4 multiple distinct mechanisms may contribute to AIDS resistance in AGM. Knowledge of the  
5 non-pathogenic nature of SIV infection in AGM may provide insight into development of  
6 new therapeutic strategies.

7

8

### 9 **ABBREVIATIONS**

10 AIDS, acquired immune deficiency syndrome; MAZR, Myc-associated Zn finger-related factor; MeDIP,  
11 methylation DNA immunoprecipitation; CXCR6, C-X-C motif chemokine receptor 6; CCR5, C-C motif  
12 chemokine receptor 5; RUNX3, Runt-related transcription factor 3; ICAM2, intercellular cell adhesion  
13 molecule-2; CCR2, C-C motif chemokine receptor 2; MMLV, moloney murine leukemia virus; ACTB,  
14 actin  $\beta$ ; TLR-4, Toll-like receptor 4; PTK2, protein tyrosine kinase 2; WWP2, ww domain-containing  
15 protein 2.

16

### 17 **Acknowledgments**

18 The authors are grateful to Professor Jun-feng Li (Institute of Microbiology and Epidemiology, Beijing,  
19 China) for technical support in QSG-MSP.

20

### 21 **Author Contributions**

22 Conceived and designed the experiments: XZ ZY. Performed the experiments: XZ JW. Wrote the paper:  
23 XZ.

24

### 25 **References**

- 26 1. Ling B, Veazey RS, Marx PA (2008). Nonpathogenic CCR2-tropic SIVrcm after serial passage and its  
27 effect on SIVmac infection of Indian rhesus macaques. *Virology* 379:38-44.
- 28 2. Zhang Y, Lou B, Lal RB, Gettie A, Marx PA, et al.(2000) Use of inhibitors to evaluate coreceptor usage  
29 by simian and simian/human immunodeficiency viruses and human immunodeficiency virus type 2 in  
30 primary cells. *J Virol* 74:6893-6910.
- 31 3. Beer BE, Foley BT, Kuiken CL, Tooze Z, Goeken RM, et al.(2001) Characterization of novel simian  
32 immunodeficiency viruses from red-capped mangabeys from Niereria (SIVrcmNG409 and -NG411). *J*  
33 *Virol* 75:12014-12027.
- 34 4. Pandrea I, Apetrei C, Dufour J, Dillon N, Barbercheck J, et al.(2006) Simian immunodeficiency virus  
35 SIVagm. sab infection of Caribbean African green monkeys: a new model for the study of SIV  
36 pathogenesis in natural hosts. *J Virol* 80:4858-4867.

- 1 5. Pandrea IV, Gautam R, Ribeiro RM, Brenchley JM, Butler IF, et al.(2007) Acute Loss of Intestinal CD4<sup>+</sup>
- 2 T-cells Is Not Predictive of Simian Immunodeficiency Virus Virulence. *J Immunol* 179:3035-3046.
- 3 6. Murayama Y, Amano A, Mukai R, Shibata S, Matsunaga S, et al.(1997) CD4 and CD8 expressions in
- 4 African green monkey helper T lymphocytes: implication for resistance to SIV infection. *Int Immunol*
- 5 9:843-851.
- 6 7. Murayama Y, Mukai R, Inoue-Murayama M, Yoshikawa Y (1999) An African green monkey lacking
- 7 peripheral CD4 lymphocytes that retains helper T-cell activity and coexists with SIVagm. *Clin Exp*
- 8 *Immunol* 117:504-512.
- 9 8. Beaumier CM, Harris LD, Goldstein S, Klatt NR, Whitted S, et al.(2009) Down-regulation of CD4 by
- 10 memory CD4<sup>+</sup> T cells in vivo renders African green monkeys resistant to progressive SIVagm infection.
- 11 *Nat Med* 15(8):879-885.
- 12 9. Udali S, Guarini P, Moruzzi S, Choi SW, Friso S (2013) Cardiovascular epigenetics: From DNA
- 13 methylation to microRNAs. *Mol Aspects Med* 34(4):883-901.
- 14 10. Mladinov D, Liu Y, Mattson DL, Liang M (2013) MicroRNAs contribute to the maintenance of
- 15 cell-type-specific physiological characteristics:miR-192 targets Na<sup>+</sup>/K<sup>+</sup>-ATPase  $\beta$ 1. *Nucleic Acids Res*
- 16 41:1273-1283.
- 17 11. Kriegel AJ, Fang Y, Liu Y, Tian Z, Mladinov D, et al.(2010) MicroRNA-target pairs in human renal
- 18 epithelial cells treated with transforming growth factor beta1: a novel role of miR-382. *Nucleic Acids Res*
- 19 38(22):8338-8347.
- 20 12. Bilic I, Koesters C, Unger B, Sekimata M, Hertweck A, et al.(2006) Negative regulation of CD8
- 21 expression via Cd8 enhancer-mediated recruitment of the zinc finger protein MAZR. *Nat Immunol*
- 22 7:392-400.
- 23 13. Taniuchi I, Osato M, Egawa T, Sunshine MJ, Bae SC, et al. (2002) Differential requirements for Runx
- 24 proteins in CD4 repression and epigenetic silencing during T-lymphocyte development. *Cell* 111:621-634.
- 25 14. Kioussis D, Ellmeier W (2002) Chromatin and CD4, CD8A and CD8B gene expression during thymic
- 26 differentiation. *Nat Rev Immunol* 2(12):909-919.
- 27 15. Paiardini M, Cervasi B, Reyes-Aviles E, Micci L, Ortiz AM, et al.(2011) Low levels of SIV infection
- 28 in sooty mangabey central memory CD4<sup>+</sup> T cells are associated with limited CCR5 expression. *Nat Med*
- 29 17(7):830-836.
- 30 16. Cartwright EK, McGary CS, Cervasi B, Micci L, Lawson B, et al. Divergent CD4<sup>+</sup> T memory stem
- 31 cell dynamics in pathogenic and nonpathogenic simian immunodeficiency virus infections. *J Immunol*
- 32 192:4666-4673.
- 33 17. Wetzel KS, Yi Y, Elliott ST, Romero D, Jacquelin B, et al.(2017) CXCR6-mediated simian
- 34 immunodeficiency virus SIVagmSab entry into Sabaeus African green monkey lymphocytes implicates
- 35 widespread use of non-CCR5 pathways in natural host infections. *J Virol* 91(4).pii:e01626-16.
- 36 18. Riddick NE, Wu F, Matsuda K, Whitted S, Ourmanov I, et al.(2015) Simian immunodeficiency virus
- 37 SIVagm efficiently utilizes non-CCR5 entry pathways in African green monkey lymphocytes: potential
- 38 role for GPR15 and CXCR6 as viral coreceptors. *J Virol* 90(5):2316-2331.
- 39 19. Palesch D, Bosinger SE, Tharp GK, Vanderford TH, Paiardini M, et al.(2018) Sooty mangabey
- 40 genome sequence provides insight into AIDS resistance in a natural SIV host. *Nature* 553(7686):77-81.
- 41 20. Vinton C, Klatt NR, Harris LD, Briant JA, Sanders-Bear BE, et al.(2011) CD4-like immunological
- 42 function by CD4<sup>-</sup> T cells in multiple natural hosts of simian immunodeficiency virus. *J Virol*
- 43 85(17):8702-8708.
- 44 21. Gordon SN, Klatt NR, Bosinger SE, Brenchley JM, Milush JM, et al.(2007) Severe Depletion of

- 1 Mucosal CD4<sup>+</sup> T-cells in AIDS-Free Simian Immunodeficiency Virus-Infected Sooty Mangabeys. J  
2 Immunol 179:3026-3034.
- 3 22. Brenchley JM, Paiardini M, Knox KS, Asher AI, Cervasi B, et al.(2008) Differential Th17 CD4 T-cell  
4 depletion in pathogenic and nonpathogenic lentiviral infections. Blood 112:2826-2835.
- 5 23. Matsunaga S, Mukai R, Inoue-Murayama M, Yoshikawa Y, Murayama Y (2000) Sequence and  
6 functional properties of African green monkey CD4 silencer. Immunol Lett 75:47-53.
- 7 24. Carthew RW, Sontheimer EJ (2009) Origins and Mechanisms of miRNAs and siRNAs. Cell  
8 136(4):642-655.
- 9 25. Siegfried Z, Eden S, Mendelsohn M, Feng X, Tsuberi BZ, et al.(1999) DNA methylation represses  
10 transcription in vivo. Nat Genet 22:203-206.
- 11 26. Cedar H, Bergman Y ( 2009 ) Linking DNA methylation and histone modification: patterns and  
12 paradigms. Nat Rev Genet 10:295-304.
- 13  
14  
15

## 16 **Supporting Information Legends**

### 17 **Figure 1. miRNA profiling and validation of junior and adult AGM PBMCs.**

18 (A) Heat map of miRNA microarray expression data from PBMC samples of junior AGM  
19 (n=3) and adult AGM (n=3). (B&C) Validation of miRNA microarray data by quantitative  
20 reverse-transcription polymerase chain reaction. The relative expression of miRNAs was  
21 normalized to expression of the internal control (U6). The *P* values were calculated by  
22 2-sided Student *t* test. \**P*<0.05; \*\**P*<0.01.

23

24 **Figure 2. Summary of miRNA-target pairs supported by the anti-miR transfection**  
25 **experiment.** The mRNA abundance for the predicted targets was significantly increased in  
26 PBMC after inhibition of the indicated endogenous miRNA. The *P* values were calculated by  
27 2-sided Student *t* test. \**P*<0.05.

28

29 **Figure 3. Enrichment map of GO categories for biological processes.** A indicates those  
30 hypermethylated genes in adult AGM while B indicates those hypomethylated genes. Colors

1 represent  $P$  values on a log scale (with red corresponding to the most highly significant,  
2  $P<0.05$ ). Node size represents the number of genes in a category.

3

4 **Figure 4. Comparative analysis of differential DNA methylation between junior and**  
5 **adult AGM. (A,B,C,D&E)** Quantitative analysis of the levels of CpG DNA methylation of  
6 *CD4*, *RUNX3*, *CXCR6*, *CCR5* and *ICAM2*. (f) Quantitative RT-PCR analysis for mRNA  
7 expression of the target genes. The  $P$  values were calculated by 2-sided Student  $t$  test. \*  
8 stands for  $P<0.05$ .

9 **Figure 5. Quantitative analysis of the levels of CpG DNA methylation of PTK2 and**  
10 **WWP2. (A&B)** Quantitative analysis of the levels of CpG DNA methylation of PTK2 and  
11 WWP2. (C) Schematic show of the cross-link between DNA methylation and miRNA  
12 expression.

13

14 **Table 1. Properties of miRNAs differentially expressed in PBMCs of adult and junior**  
15 **African green monkeys.**

16

17 **Supplementary Table 1. Sequences of the primers used in the SYBR-green-based**  
18 **quantitative RT-PCR validation.**

19

20 **Supplementary table 2. Primer Sequences for quantitative analysis of AGM CD4,CD8a,**  
21 **MAZR.**

22

23 **Supplementary Table 3 . Primer Sequences and PCR Conditions for MSP Analysis.**

24

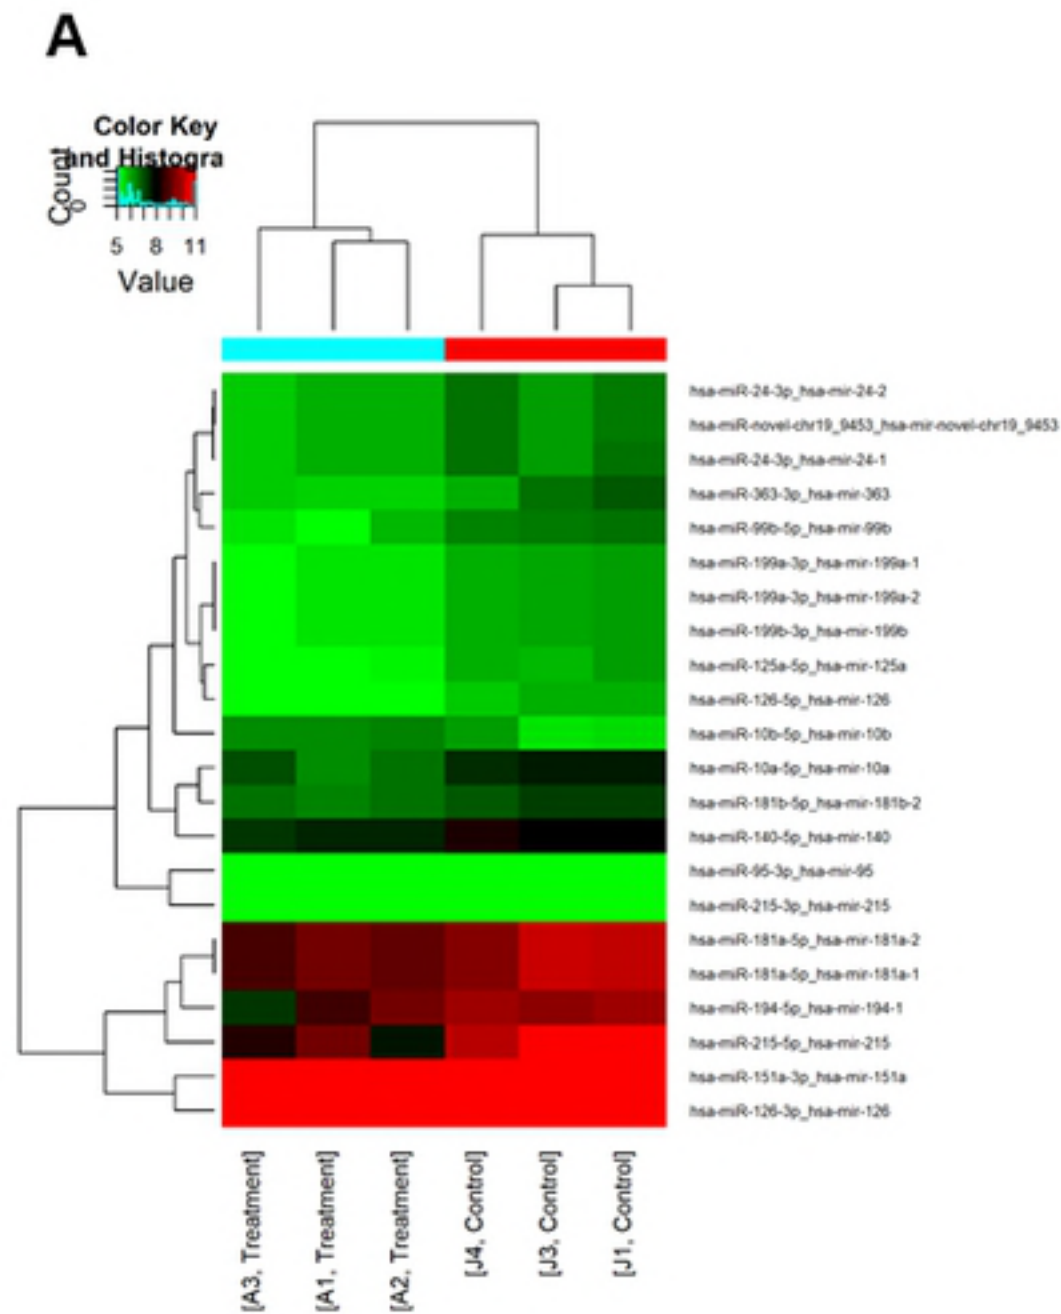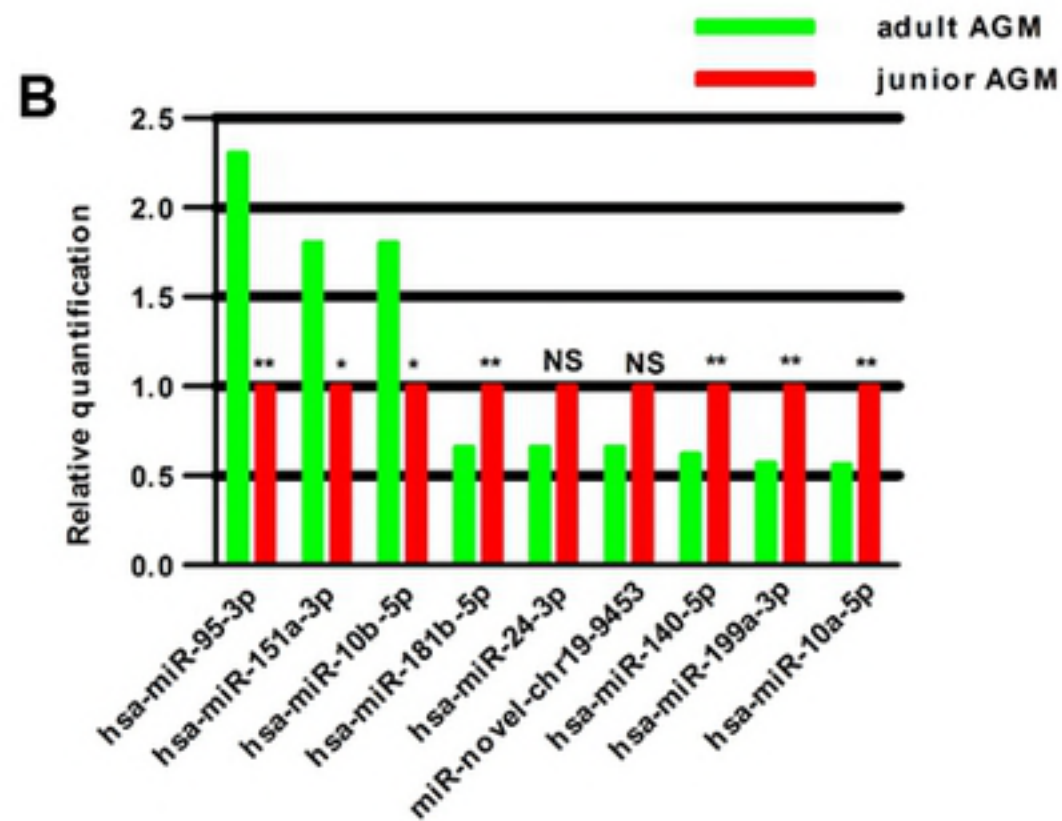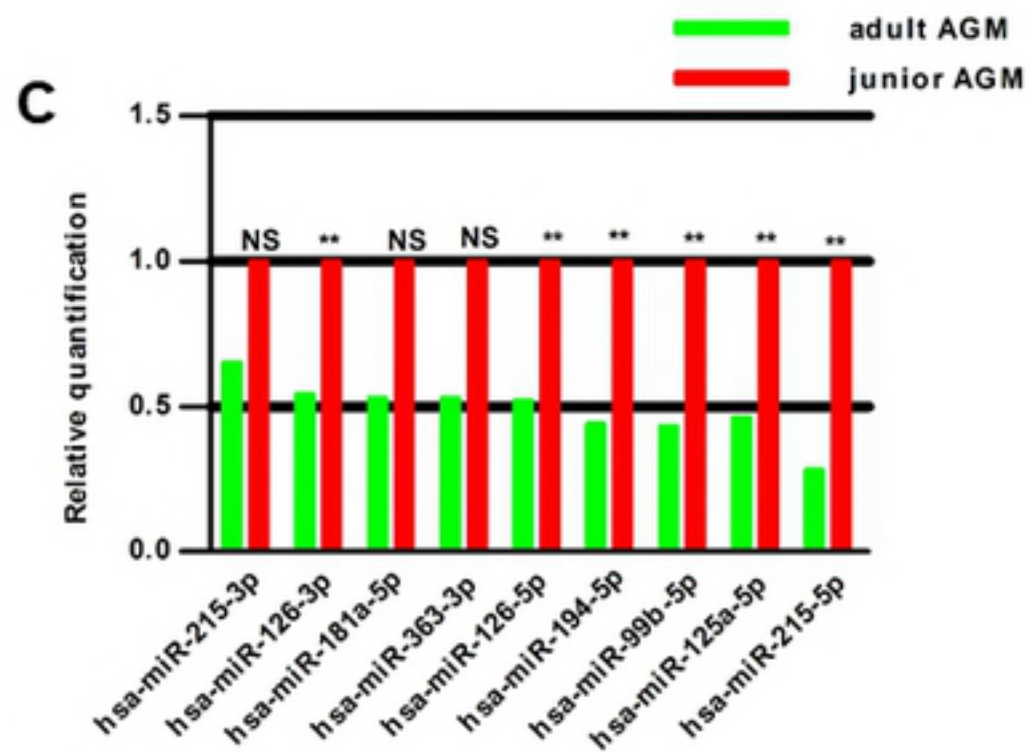

**A**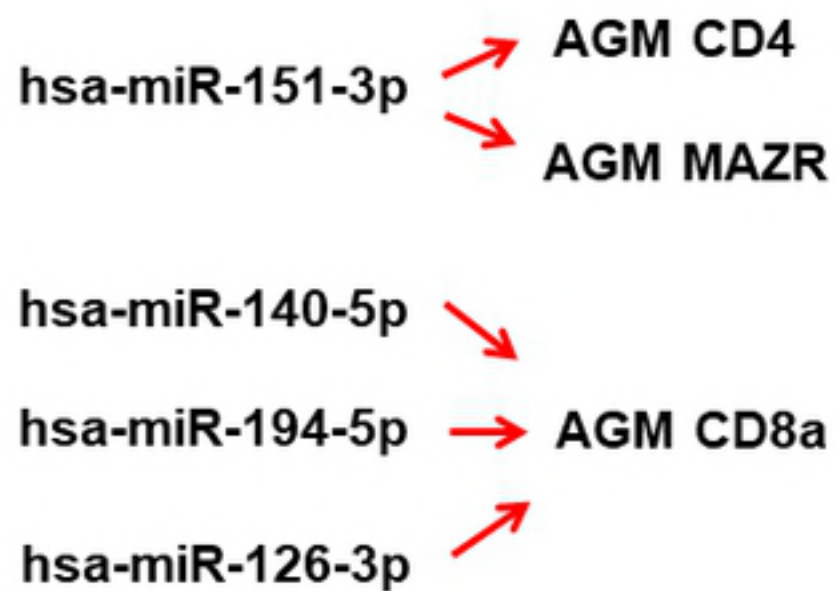**B**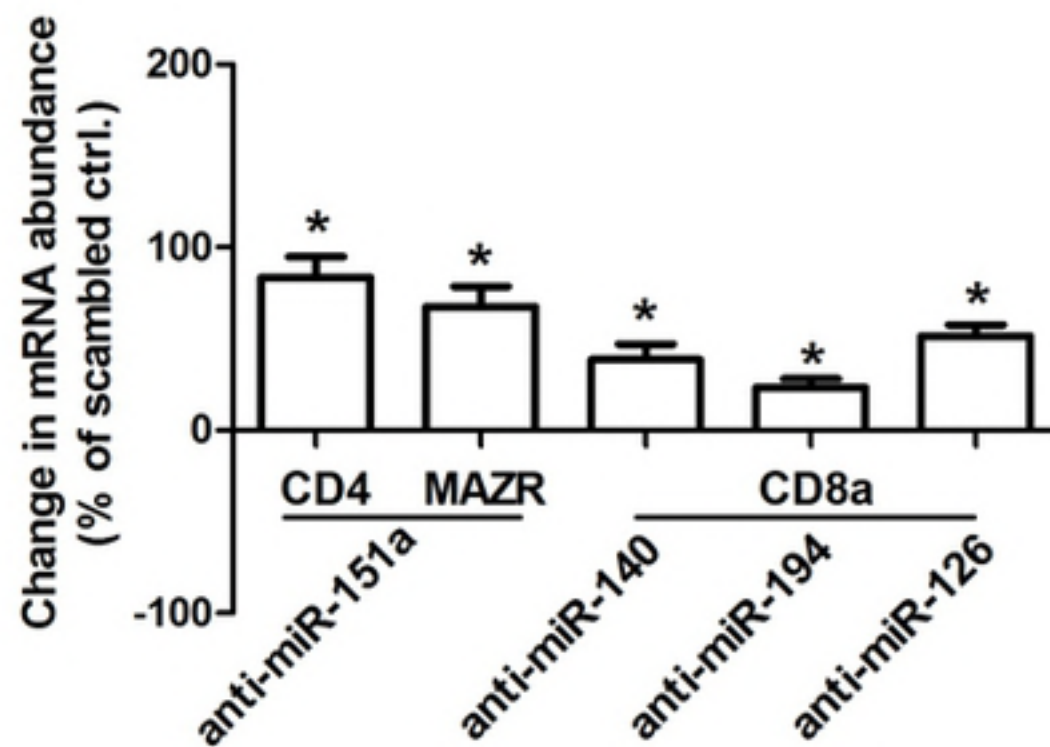



**A**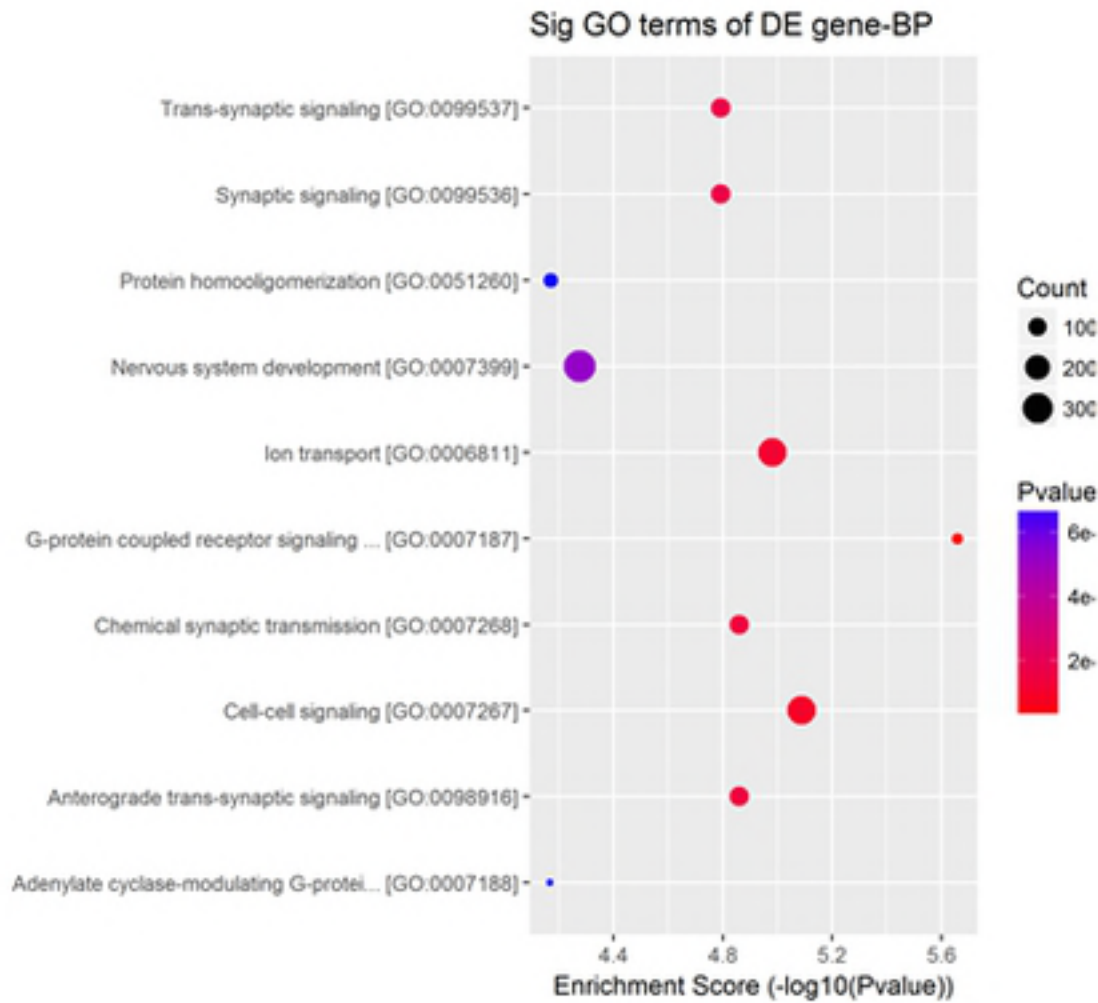**B**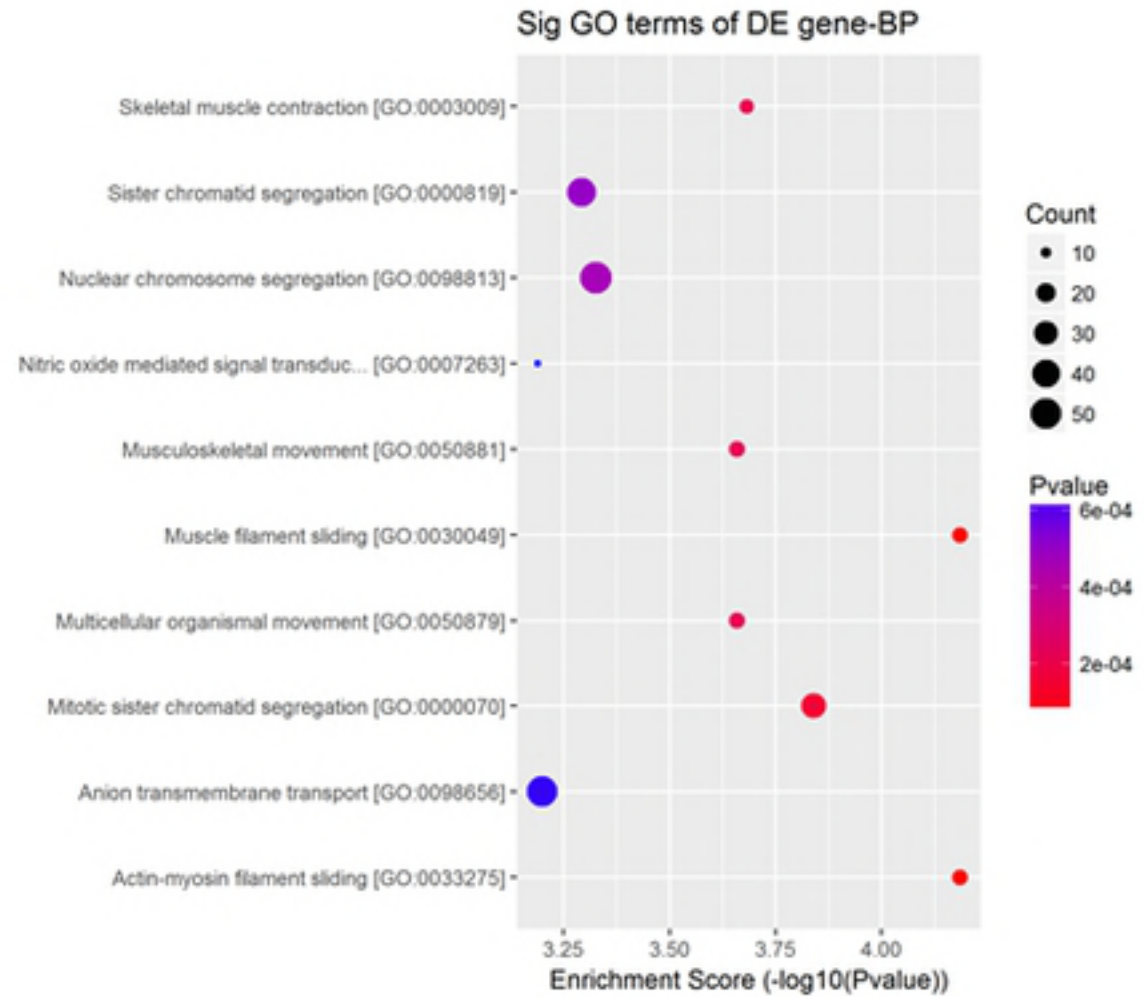

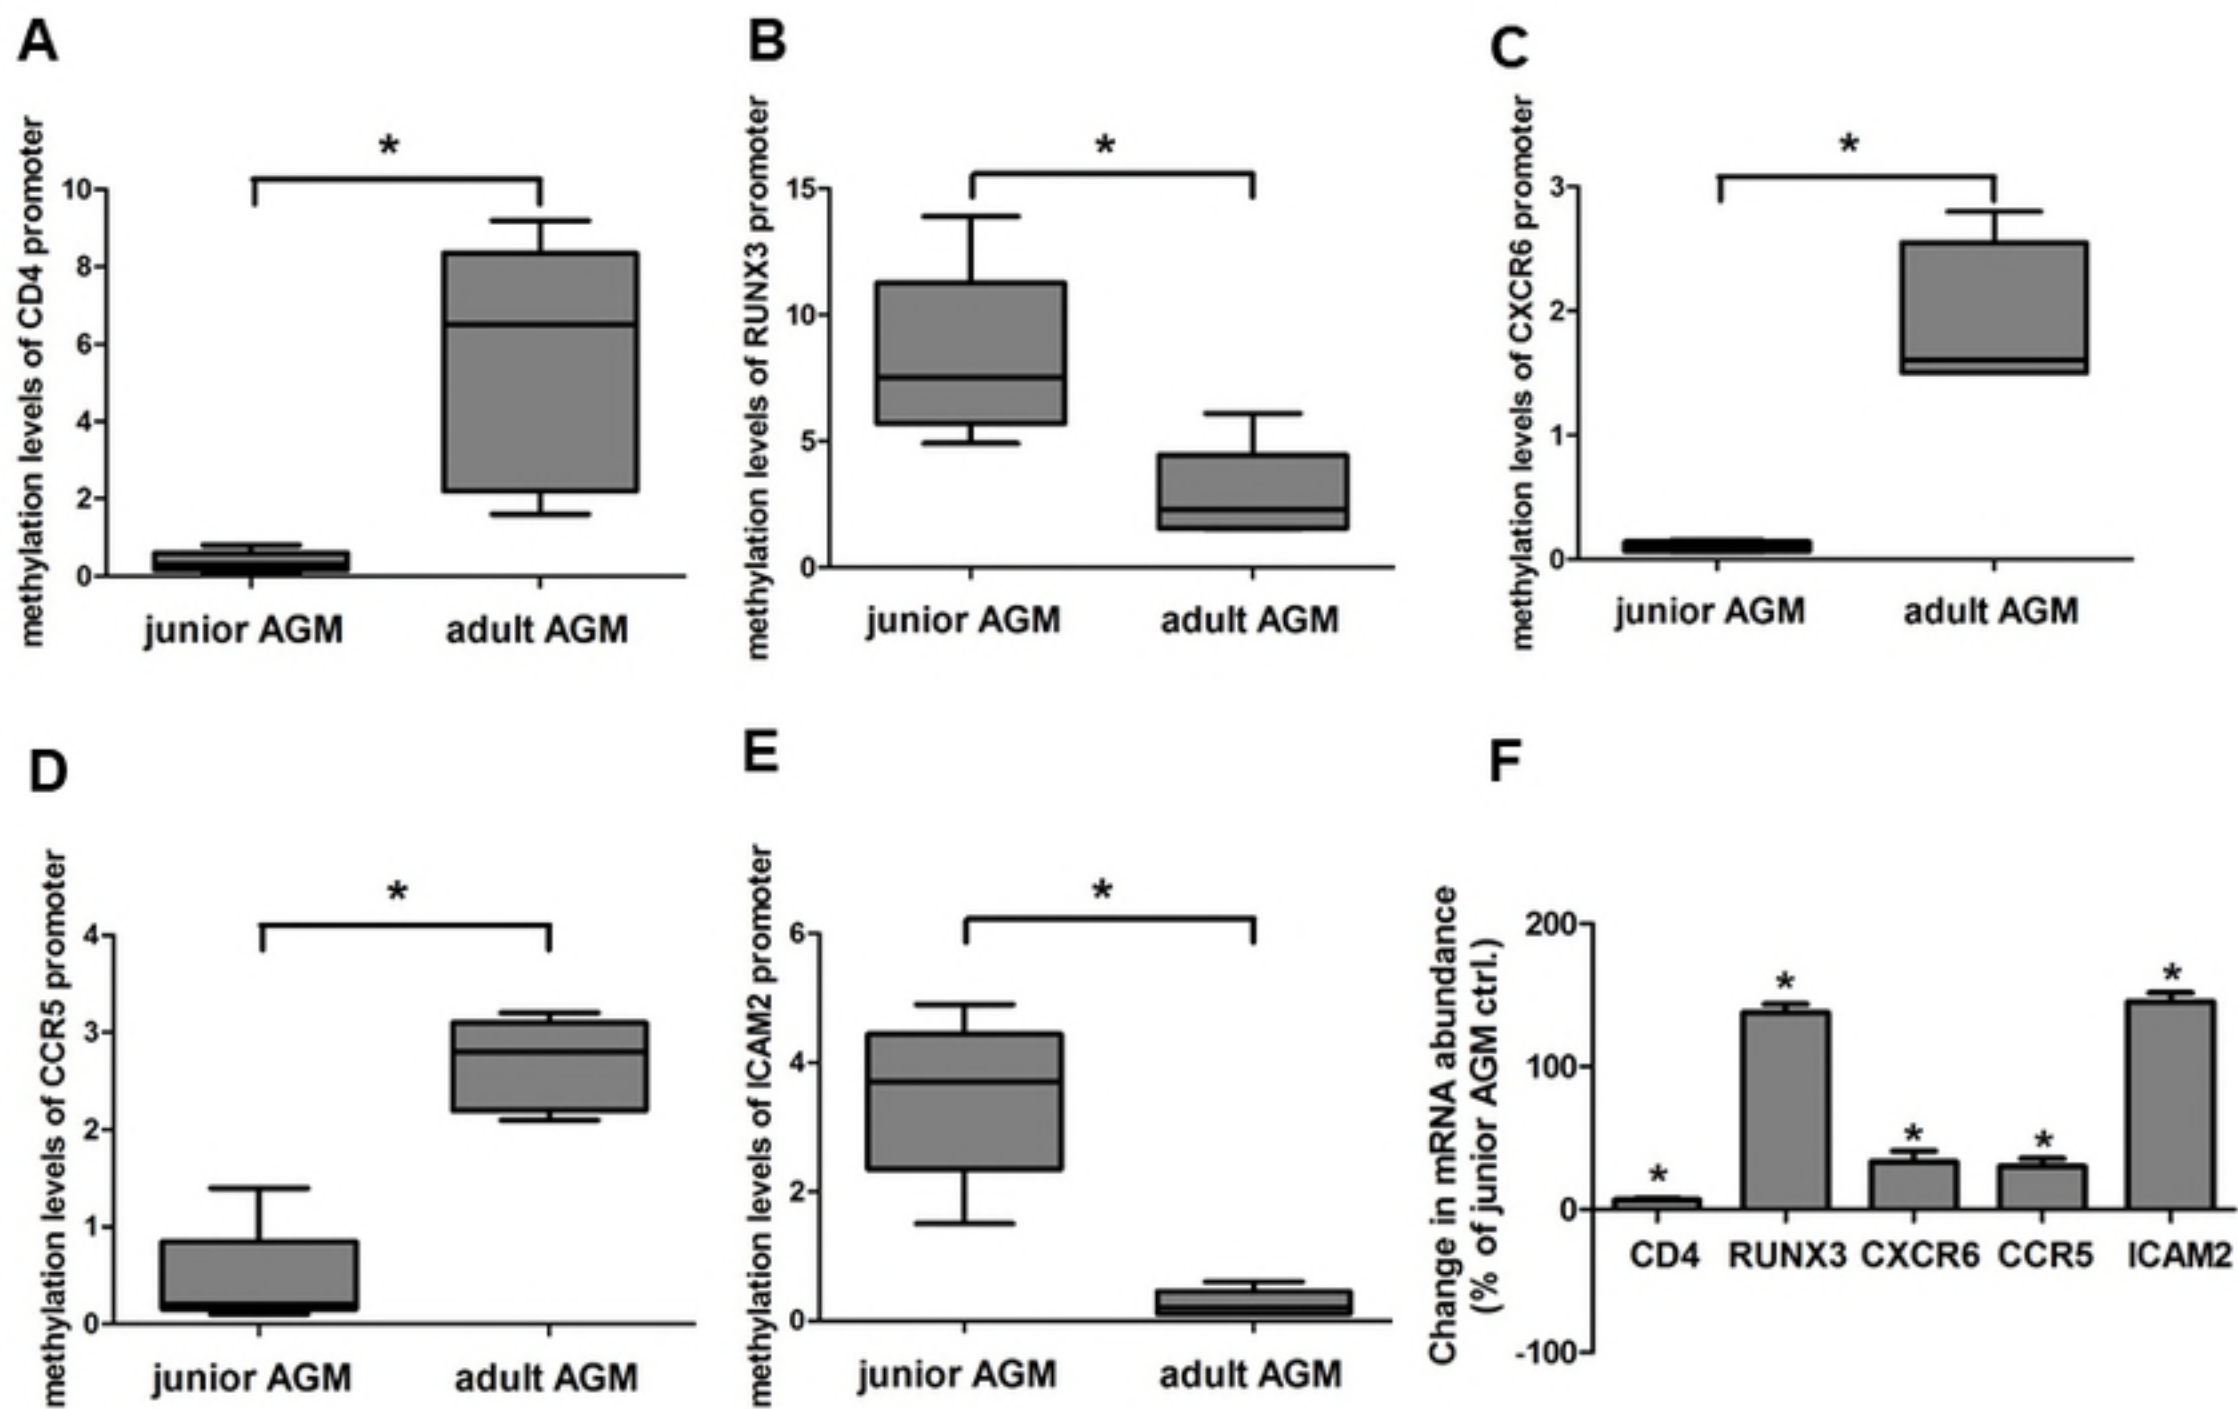

**A**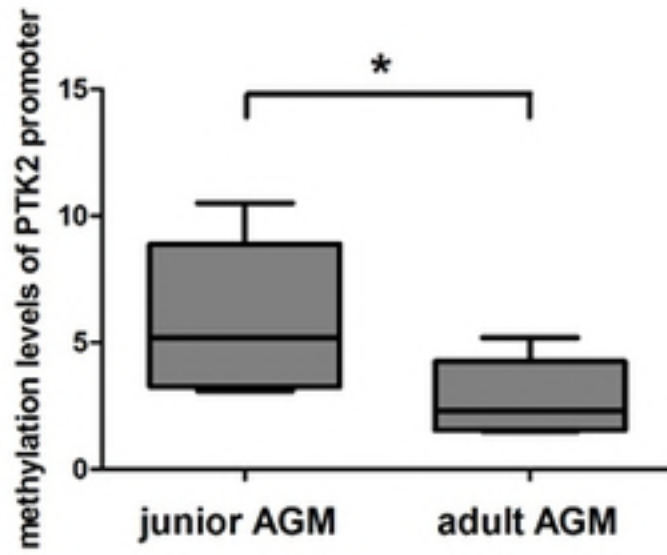**B**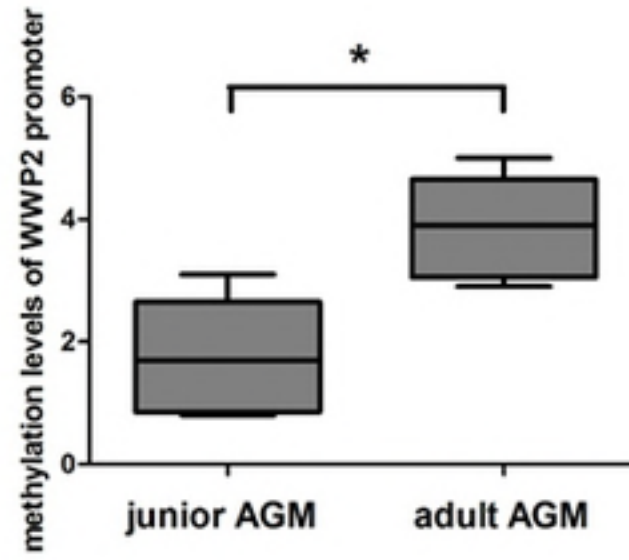**C**

PTK2 → hsa-miR-151-3p  
WWP2 → hsa-miR-140-5p
